# Supplementary material for: The neural network based Δ-machine learning approach efficiently brings the DFT potential energy surface to the CCSD(T) quality: a case for the OH + CH 3 OH reaction
Source: Royal Society of Chemistry journal article supplement (doi:10.1039/d3cp00665d), 2023-01-01
Supplement: d3cp00665d8.pdf [file d3cp00665d8.pdf]

## Supporting information for

**$\Delta$ -Machine learning approach efficiently brings the DFT based potential energy surface to the  
CCSD(T) quality: a case for the OH + CH<sub>3</sub>OH reaction**

Kaisheng Song,<sup>1</sup> and Jun Li<sup>1,\*</sup>

<sup>1</sup> *School of Chemistry and Chemical Engineering & Chongqing Key Laboratory of Theoretical and  
Computational Chemistry, Chongqing University, Chongqing 401331, P.R. China*

\*: Corresponding author, email: [jli15@cqu.edu.cn](mailto:jli15@cqu.edu.cn) (JL).

## SI. DFT calculations

As mentioned in text, how to choose an appropriate low-level method is one of the key problems we need to face. Thus, we should know the rules about how to define “an appropriate low-level method”. First, the selected low-level method should be used to get convergent, correct, and smooth results in the same configuration space as the target high-level method. If not, the target high-level PES cannot be developed due to the uncovered or the nonconvergent configuration space. Second, the energy differences between the low- and the target high-level method in all configuration space should be small, smooth and nonnegative. The smaller the energy deviations between the low-level and the target high-level method, the fewer points are need to develop the correction PES and the cheaper the cost. The smooth and nonnegative requirements of the energy differences in all configuration space guarantee a highly accurate correction PES. Third, the selected low-level method should be highly efficient to reduce the cost as much as possible. In order to select an appropriate low-level method meeting all the demanding mentioned above, many DFT methods have been tested by G16. Table S2 displays the comparison of energy (in kcal mol<sup>-1</sup>) and vibrational frequencies (in cm<sup>-1</sup>) of the stationary points from 12 methods for the title reaction. Thanks to Ying Zhang for two candidate methods, UB3LYP/6-311+G(3df,2p) and UM05-2X/6-311+G(3df,2p), selected from 40 DFT methods. Compared with the target high-level (UCCSD(T)-F12a/AVTZ) method in Table S1, the molecular properties including energy and frequencies of stationary points from the UM05-2X/6-311+G(3df,2p) method were closer than others, particularly of which at TS1 and TS2. In addition to the molecular properties, several one-dimensional scans for each low-level method have also been performed to check if satisfy the requirements mentioned above, and we have found that none of the 12 methods could fulfill all the requirements with default settings, but lowering the energy convergence threshold to 10<sup>-6</sup>, which is reliable and acceptable, could greatly improve the situation. Only the results from UM05-2X/6-311+G(3df,2p) were continuous, smooth and nonnegative. For the title reaction system, the high efficiency for UM05-2X/6-311+G(3df,2p) was apparently evident that only about 1~3 mins were needed for one single point energy calculation with 4 processors on a

slave node with Intel Xeon CPU E5-2682 V4 @2.5GHZ compared with the target high-level method (UCCSD(T)-F12a/AVTZ) taking about 30~70 mins for one single point energy calculation with 8 processors on the same node. Finally, UM05-2X/6-311+G(3df,2p) successfully passed in all tests and was chosen as the low-level method.

### SII. Figures and Tables

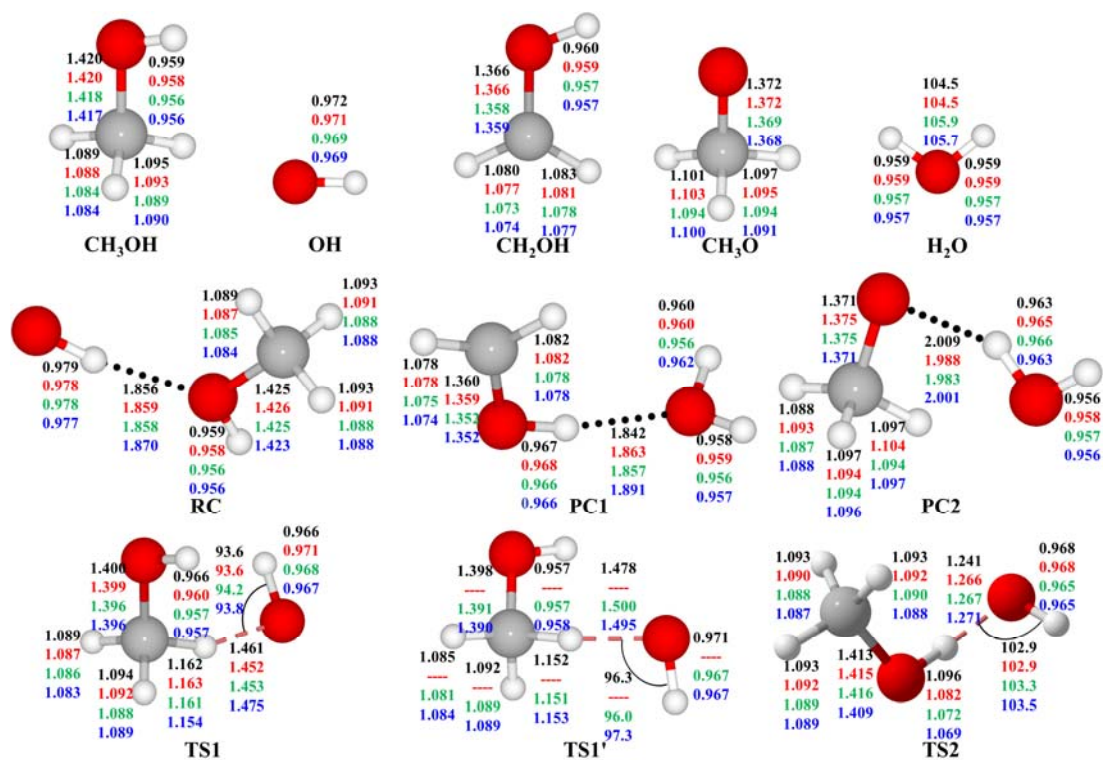

**Figure S1.** Comparison of geometries of the stationary points (angle in degree and distance in Å) obtained from different levels: PESH, UCCSD(T)-F12a/AVTZ, PESL, M05-2X/6-311+G(3df,2p), from top to bottom.

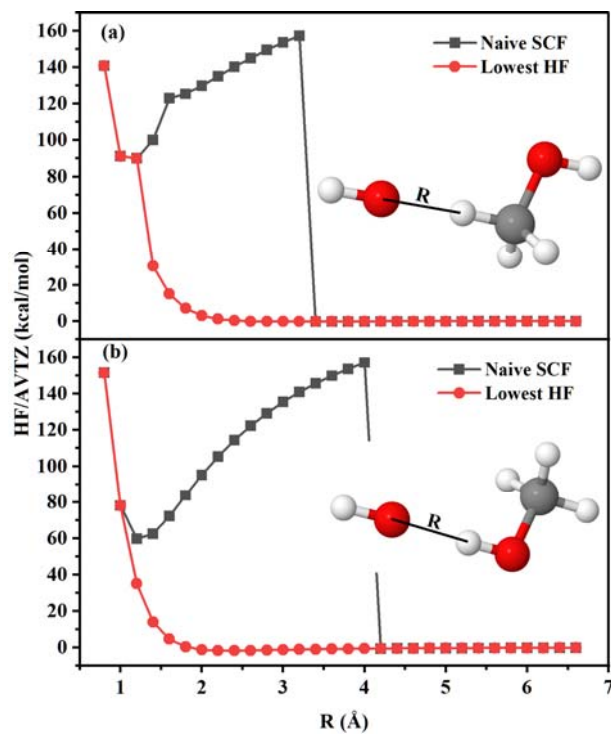

**Figure S2.** Comparison of the Hartree-Fock reference energies relative to the reactants  $\text{CH}_3\text{OH}$  and  $\text{OH}$ , calculated from the default SCF procedure and the lowest HF method for (a) and (b), respectively.

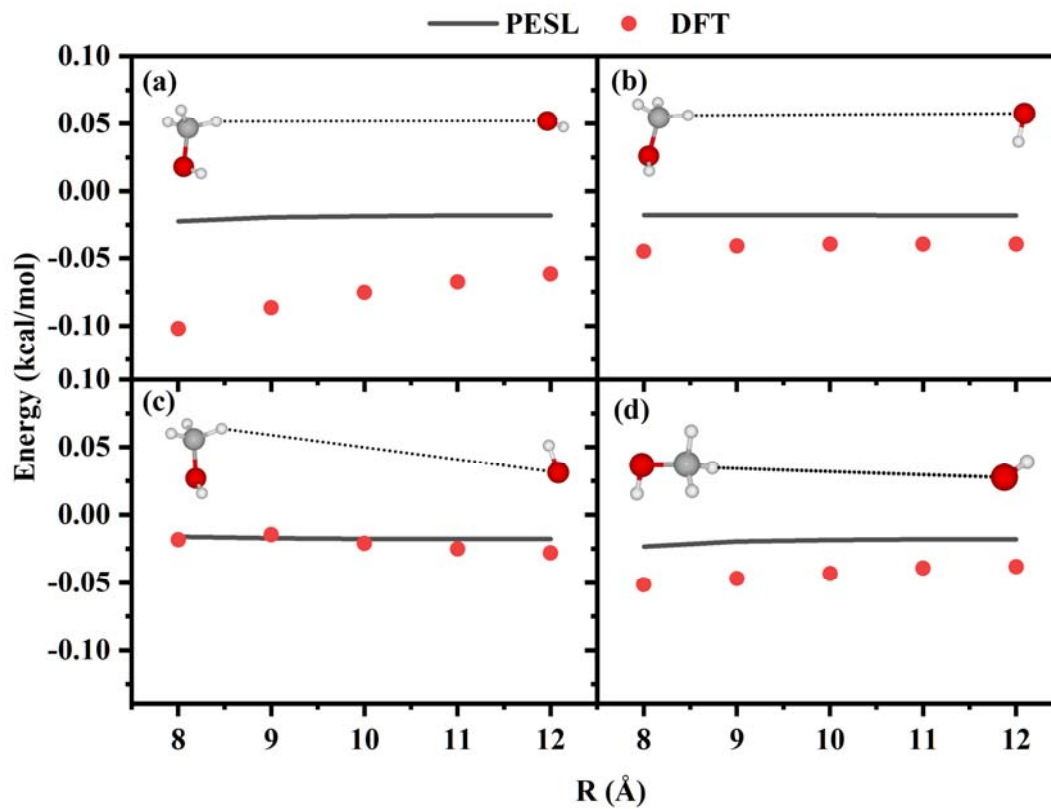

**Figure S3.** Four one-dimensional cuts for the long-range interaction between OH and CH<sub>3</sub>OH at different orientations with other coordinates fixed at the equilibrium of the reactants.

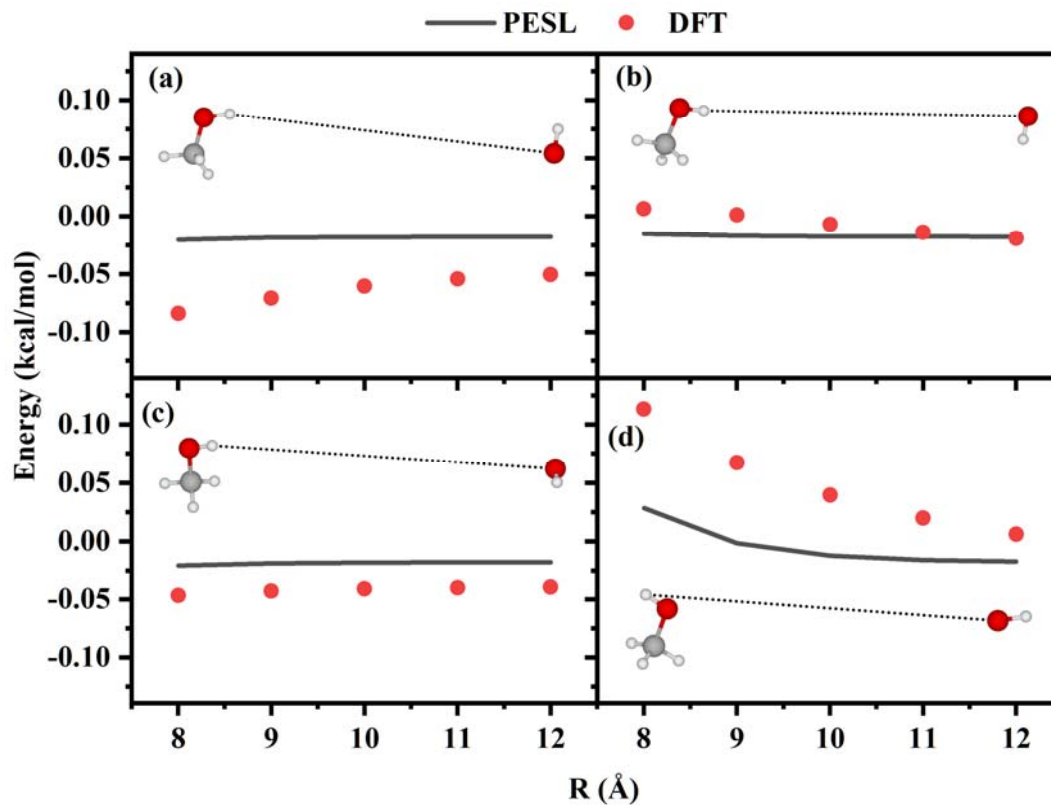

**Figure S4.** Four one-dimensional cuts for the long-range interaction at different orientations between OH and CH<sub>3</sub>OH with other coordinates fixed at the equilibrium of the reactants.

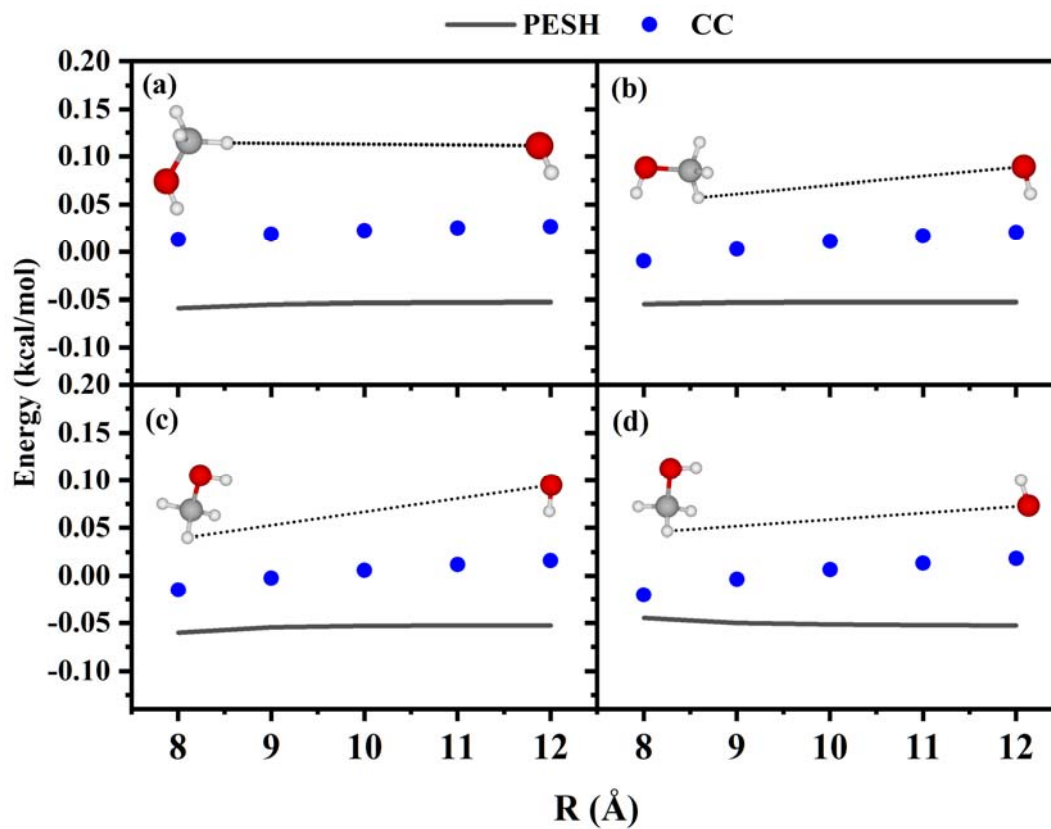

**Figure S5.** Four one-dimensional cuts at different orientations between  $\text{CH}_3\text{OH}$  and  $\text{OH}$  with other coordinates fixed at the equilibrium of the reactants.



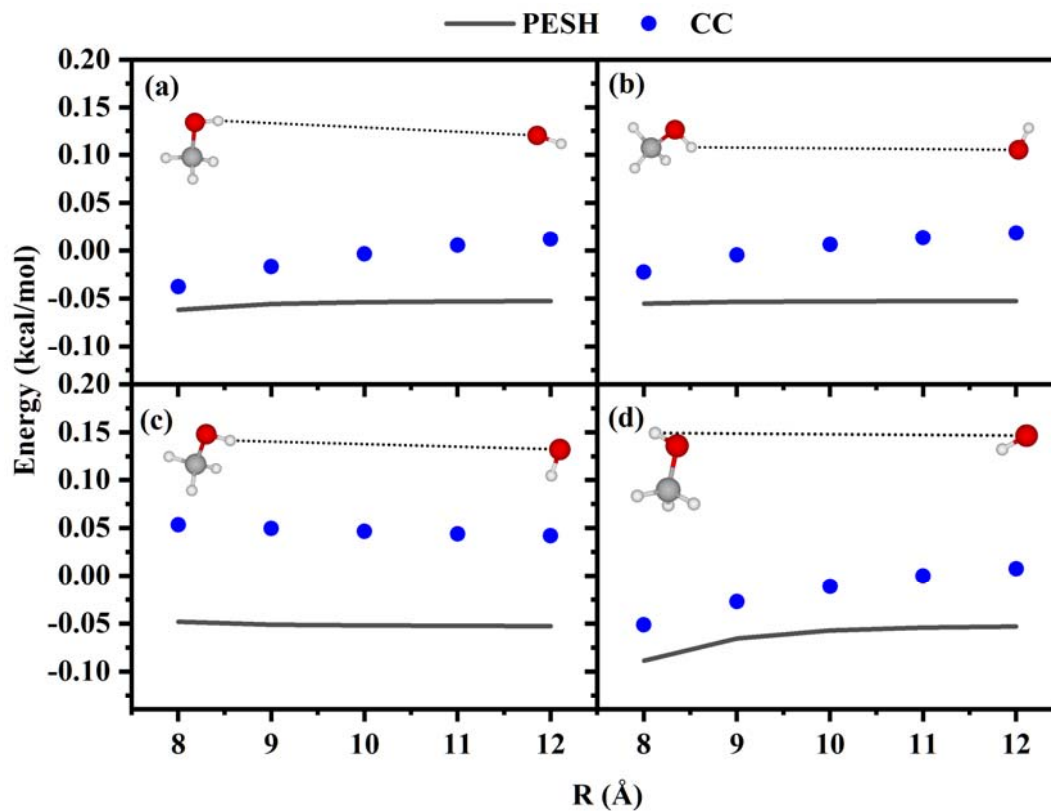

**Figure S6.** Four one-dimensional cuts for the interaction at different orientations between  $\text{CH}_3\text{OH}$  and  $\text{OH}$  with other coordinates fixed at the equilibrium of the reactants.

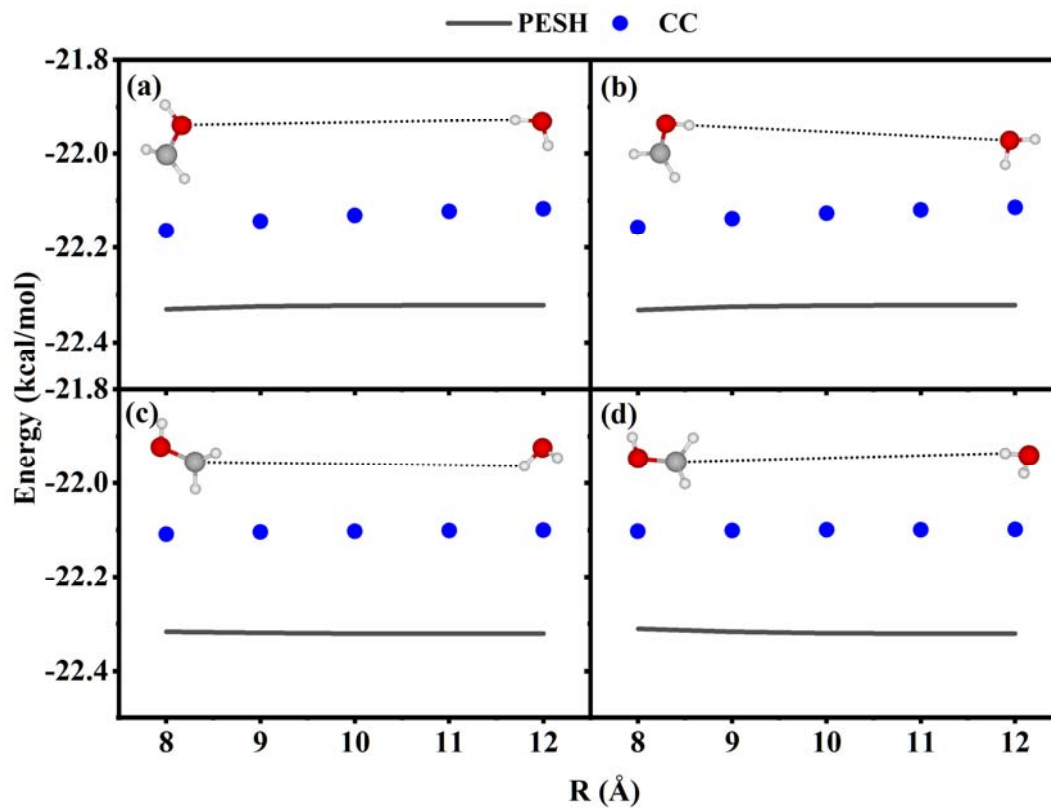

**Figure S7.** Four one-dimensional cuts for the long-range interaction at different orientations between  $\text{CH}_2\text{OH}$  and  $\text{H}_2\text{O}$  with other coordinates fixed at the equilibrium of the monomer.

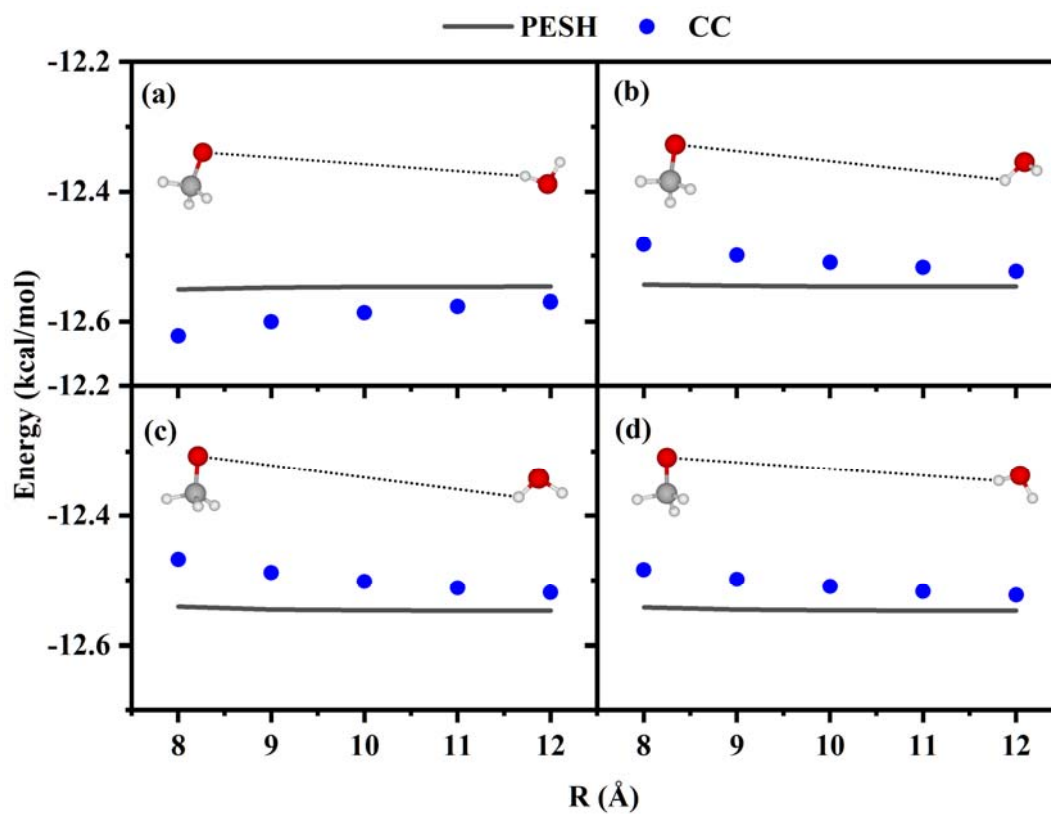

**Figure S8.** Four one-dimensional cuts for the long-range interaction at different orientations between  $\text{CH}_3\text{O}$  and  $\text{H}_2\text{O}$  with other coordinates fixed at the equilibrium of the monomer.

**Table S1.** Energies (kcal/mol) and vibrational harmonic frequencies (cm<sup>-1</sup>) of the stationary points for the title reaction.

| Species                                  | Method<br>s | Energy<br>y | Frequencies |          |          |          |          |          |          |          |          |          |          |          |          |    |    |    |    |    |
|------------------------------------------|-------------|-------------|-------------|----------|----------|----------|----------|----------|----------|----------|----------|----------|----------|----------|----------|----|----|----|----|----|
|                                          |             |             | 1           | 2        | 3        | 4        | 5        | 6        | 7        | 8        | 9        | 10       | 11       | 12       | 13       | 14 | 15 | 16 | 17 | 18 |
| OH + CH <sub>3</sub> OH                  | a           | 0.00        | 3730        | 223      | 105<br>3 | 1140     | 119<br>1 | 142<br>4 | 148<br>5 | 153<br>6 | 155<br>0 | 305<br>5 | 311<br>8 | 318<br>8 | 390<br>4 |    |    |    |    |    |
|                                          | b           | 0.00        | 3745        | 281      | 106<br>0 | 108<br>7 | 118<br>3 | 139<br>1 | 146<br>3 | 153<br>0 | 153<br>2 | 302<br>5 | 308<br>6 | 315<br>7 | 386<br>7 |    |    |    |    |    |
|                                          | c           | 0.00        | 3737        | 288      | 106<br>1 | 108<br>8 | 117<br>9 | 138<br>1 | 148<br>3 | 151<br>0 | 152<br>0 | 301<br>7 | 307<br>7 | 313<br>7 | 386<br>3 |    |    |    |    |    |
|                                          | d           | 0.00        | 3731        | 291      | 106<br>3 | 108<br>8 | 117<br>8 | 137<br>8 | 148<br>0 | 150<br>5 | 151<br>5 | 301<br>4 | 307<br>3 | 313<br>4 | 385<br>9 |    |    |    |    |    |
|                                          | e           | 0.00        | 3806        | 294      | 107<br>4 | 1101     | 119<br>8 | 137<br>1 | 150<br>6 | 153<br>4 | 154<br>1 | 307<br>2 | 312<br>3 | 318<br>2 | 392<br>9 |    |    |    |    |    |
|                                          | f           | 0.00        | 3812        | 270      | 108<br>1 | 1103     | 120<br>5 | 138<br>2 | 150<br>0 | 154<br>6 | 154<br>6 | 307<br>7 | 312<br>4 | 319<br>4 | 392<br>6 |    |    |    |    |    |
| H <sub>2</sub> O +<br>CH <sub>2</sub> OH | a           | -22.11      | 1802        | 387<br>4 | 395<br>8 | 278      | 468      | 110<br>3 | 119<br>6 | 139<br>1 | 147<br>1 | 317<br>5 | 337<br>2 | 389<br>1 |          |    |    |    |    |    |
|                                          | b           | -22.29      | 1672        | 383<br>6 | 394<br>2 | 462      | 547      | 108<br>6 | 120<br>7 | 141<br>3 | 152<br>9 | 316<br>0 | 331<br>2 | 390<br>0 |          |    |    |    |    |    |
|                                          | c           | -22.10      | 1645        | 383<br>1 | 394<br>2 | 430      | 580      | 106<br>3 | 121<br>0 | 137<br>4 | 149<br>4 | 314<br>9 | 329<br>2 | 385<br>9 |          |    |    |    |    |    |
|                                          | d           | -22.07      | 1643        | 383<br>0 | 394<br>0 | 434      | 576      | 106<br>2 | 120<br>9 | 137<br>2 | 149<br>2 | 314<br>5 | 328<br>9 | 385<br>6 |          |    |    |    |    |    |
|                                          | e           | -22.55      | 1614        | 389<br>5 | 399<br>6 | 406      | 553      | 106<br>6 | 123<br>8 | 135<br>9 | 150<br>9 | 320<br>5 | 334<br>6 | 392<br>2 |          |    |    |    |    |    |
|                                          | f           | -22.52      | 1625        | 389<br>9 | 401<br>5 | 450      | 525      | 108<br>2 | 123<br>7 | 139<br>7 | 154<br>2 | 322<br>3 | 338<br>3 | 395<br>5 |          |    |    |    |    |    |
| H <sub>2</sub> O + CH <sub>3</sub> O     | a           | -13.52      | 1799        | 387<br>0 | 394<br>7 | 842      | 843      | 108<br>1 | 143<br>2 | 144<br>0 | 144<br>1 | 306<br>9 | 308<br>4 | 308<br>5 |          |    |    |    |    |    |
|                                          | b           | -12.78      | 1650        | 383<br>8 | 395<br>1 | 636      | 636      | 109<br>1 | 136<br>3 | 144<br>7 | 144<br>7 | 295<br>9 | 305<br>6 | 305<br>8 |          |    |    |    |    |    |
|                                          | c           | -12.55      | 1645        | 383<br>1 | 394<br>2 | 755      | 962      | 1116     | 138<br>3 | 138<br>6 | 152<br>1 | 294<br>0 | 302<br>1 | 306<br>5 |          |    |    |    |    |    |

|     |          |        |       |          |          |     |     |          |          |          |          |          |          |          |          |          |          |          |          |          |
|-----|----------|--------|-------|----------|----------|-----|-----|----------|----------|----------|----------|----------|----------|----------|----------|----------|----------|----------|----------|----------|
|     | <i>d</i> | -12.57 | 1643  | 383<br>0 | 394<br>0 | 756 | 965 | 1118     | 138<br>0 | 138<br>1 | 151<br>8 | 293<br>4 | 301<br>8 | 306<br>4 |          |          |          |          |          |          |
|     | <i>e</i> | -13.44 | 1614  | 389<br>5 | 399<br>6 | 857 | 982 | 113<br>8 | 141<br>1 | 141<br>6 | 154<br>0 | 299<br>8 | 307<br>0 | 311<br>2 |          |          |          |          |          |          |
|     | <i>f</i> | -13.60 | 1613  | 387<br>6 | 398<br>3 | 711 | 712 | 110<br>5 | 143<br>3 | 147<br>9 | 147<br>9 | 301<br>7 | 311<br>0 | 311<br>0 |          |          |          |          |          |          |
| RC  | <i>a</i> | -6.95  | 49    | 57       | 160      | 258 | 478 | 527      | 104<br>4 | 115<br>7 | 122<br>9 | 134<br>5 | 150<br>7 | 156<br>7 | 157<br>1 | 308<br>0 | 314<br>6 | 317<br>2 | 370<br>7 | 395<br>1 |
|     | <i>b</i> | -6.60  | 21    | 61       | 74       | 207 | 479 | 548      | 106<br>1 | 112<br>5 | 120<br>2 | 139<br>1 | 145<br>8 | 152<br>5 | 152<br>6 | 305<br>1 | 315<br>0 | 317<br>6 | 358<br>0 | 390<br>7 |
|     | <i>c</i> | -6.53  | 54    | 86       | 199      | 304 | 411 | 616      | 106<br>5 | 108<br>8 | 118<br>3 | 138<br>1 | 148<br>5 | 151<br>3 | 152<br>2 | 303<br>4 | 310<br>3 | 314<br>9 | 360<br>8 | 387<br>2 |
|     | <i>d</i> | -6.54  | 185   | 134      | 192      | 278 | 398 | 610      | 106<br>7 | 108<br>2 | 117<br>8 | 137<br>5 | 148<br>4 | 150<br>6 | 151<br>3 | 302<br>9 | 309<br>8 | 314<br>4 | 359<br>9 | 386<br>6 |
|     | <i>e</i> | -6.81  | 16    | 48       | 204      | 263 | 408 | 605      | 107<br>8 | 108<br>8 | 120<br>3 | 136<br>6 | 151<br>0 | 153<br>5 | 154<br>2 | 308<br>8 | 314<br>8 | 319<br>1 | 365<br>3 | 393<br>0 |
|     | <i>f</i> | -6.87  | 44    | 56       | 217      | 285 | 469 | 558      | 107<br>8 | 109<br>4 | 123<br>3 | 139<br>9 | 149<br>0 | 154<br>2 | 155<br>4 | 307<br>3 | 317<br>9 | 318<br>6 | 361<br>5 | 394<br>5 |
| PC1 | <i>a</i> | -31.13 | 107   | 137      | 225      | 288 | 404 | 542      | 594      | 988      | 108<br>9 | 128<br>6 | 157<br>9 | 171<br>1 | 186<br>1 | 323<br>5 | 340<br>7 | 346<br>0 | 392<br>9 | 4111     |
|     | <i>b</i> | -28.79 | 36    | 50       | 133      | 180 | 221 | 300      | 504      | 678      | 109<br>4 | 122<br>3 | 143<br>7 | 153<br>5 | 170<br>2 | 318<br>1 | 331<br>7 | 380<br>8 | 382<br>8 | 395<br>5 |
|     | <i>c</i> | -28.69 | 71    | 90       | 171      | 191 | 239 | 295      | 548      | 760      | 110<br>9 | 122<br>7 | 144<br>1 | 149<br>4 | 164<br>7 | 314<br>0 | 327<br>9 | 370<br>2 | 382<br>8 | 393<br>5 |
|     | <i>d</i> | -28.70 | 104   | 125      | 194      | 201 | 243 | 307      | 543      | 765      | 110<br>8 | 122<br>6 | 143<br>8 | 149<br>2 | 164<br>5 | 313<br>7 | 327<br>7 | 370<br>0 | 382<br>7 | 393<br>3 |
|     | <i>e</i> | -28.76 | 24    | 83       | 135      | 158 | 201 | 290      | 520      | 739      | 110<br>6 | 125<br>7 | 141<br>5 | 150<br>9 | 161<br>3 | 319<br>4 | 333<br>3 | 376<br>4 | 388<br>7 | 398<br>7 |
|     | <i>f</i> | -28.90 | 60    | 83       | 135      | 141 | 213 | 300      | 438      | 755      | 109<br>8 | 127<br>2 | 145<br>6 | 154<br>6 | 163<br>9 | 321<br>3 | 331<br>5 | 377<br>1 | 387<br>0 | 402<br>6 |
| PC2 | <i>a</i> | -18.62 | 120.4 | 94       | 136      | 146 | 281 | 303      | 819      | 852      | 110<br>0 | 142<br>2 | 143<br>4 | 147<br>5 | 184<br>6 | 302<br>4 | 315<br>2 | 317<br>1 | 396<br>0 | 408<br>7 |
|     | <i>b</i> | -17.61 | 96    | 108      | 125      | 168 | 289 | 385      | 734      | 782      | 107<br>2 | 137<br>3 | 144<br>0 | 145<br>3 | 170<br>7 | 290<br>8 | 304<br>5 | 314<br>9 | 384<br>3 | 397<br>2 |

|     |          |        |           |     |     |     |     |     |          |          |          |          |          |          |          |          |          |          |          |          |
|-----|----------|--------|-----------|-----|-----|-----|-----|-----|----------|----------|----------|----------|----------|----------|----------|----------|----------|----------|----------|----------|
| TS1 | <i>c</i> | -17.62 | i70       | 91  | 111 | 184 | 347 | 423 | 894      | 100<br>7 | 1116     | 137<br>6 | 139<br>4 | 151<br>2 | 165<br>9 | 293<br>4 | 303<br>0 | 308<br>6 | 374<br>8 | 391<br>5 |
|     | <i>d</i> | -17.71 | 45        | 82  | 112 | 179 | 336 | 413 | 873      | 101<br>4 | 112<br>1 | 136<br>8 | 139<br>1 | 150<br>9 | 165<br>5 | 292<br>9 | 302<br>5 | 308<br>5 | 374<br>5 | 391<br>3 |
|     | <i>e</i> | -18.86 | i14       | 43  | 111 | 195 | 285 | 337 | 687      | 105<br>6 | 121<br>1 | 138<br>5 | 146<br>4 | 151<br>5 | 162<br>4 | 301<br>3 | 304<br>4 | 314<br>1 | 380<br>3 | 396<br>7 |
|     | <i>f</i> | -18.84 | 90        | 125 | 148 | 176 | 314 | 373 | 798      | 812      | 108<br>1 | 146<br>1 | 150<br>4 | 151<br>3 | 167<br>4 | 300<br>5 | 313<br>8 | 323<br>7 | 377<br>8 | 394<br>2 |
|     | <i>a</i> | 1.39   | i624      | 86  | 117 | 276 | 355 | 782 | 984      | 112<br>4 | 118<br>4 | 138<br>2 | 140<br>6 | 142<br>0 | 147<br>5 | 159<br>7 | 315<br>6 | 320<br>3 | 376<br>4 | 392<br>1 |
|     | <i>b</i> | 1.30   | i934      | 108 | 209 | 277 | 434 | 704 | 980      | 109<br>4 | 114<br>3 | 128<br>8 | 136<br>4 | 139<br>3 | 152<br>1 | 170<br>9 | 307<br>3 | 320<br>4 | 370<br>3 | 391<br>3 |
| TS2 | <i>c</i> | 1.39   | i696      | i31 | 166 | 172 | 388 | 740 | 101<br>5 | 106<br>5 | 114<br>1 | 135<br>5 | 138<br>9 | 144<br>0 | 147<br>5 | 157<br>3 | 304<br>8 | 315<br>3 | 373<br>3 | 384<br>3 |
|     | <i>d</i> | 1.23   | i653      | 99  | 155 | 251 | 423 | 755 | 102<br>7 | 107<br>7 | 114<br>7 | 135<br>0 | 139<br>7 | 145<br>0 | 147<br>7 | 159<br>7 | 305<br>1 | 315<br>3 | 373<br>1 | 384<br>1 |
|     | <i>e</i> | 0.88   | i101<br>6 | 93  | 170 | 241 | 433 | 739 | 947      | 108<br>0 | 115<br>6 | 135<br>4 | 140<br>9 | 144<br>2 | 150<br>8 | 164<br>9 | 310<br>4 | 320<br>3 | 381<br>2 | 390<br>9 |
|     | <i>f</i> | 0.72   | i811      | 77  | 179 | 215 | 414 | 745 | 997      | 110<br>7 | 117<br>8 | 138<br>0 | 142<br>4 | 145<br>1 | 155<br>2 | 169<br>7 | 313<br>8 | 322<br>2 | 381<br>7 | 397<br>0 |
|     | <i>a</i> | 3.87   | i155<br>3 | 71  | 143 | 228 | 253 | 818 | 105<br>4 | 109<br>2 | 110<br>2 | 137<br>6 | 149<br>1 | 155<br>1 | 162<br>3 | 162<br>4 | 302<br>8 | 310<br>5 | 311<br>5 | 383<br>0 |
|     | <i>b</i> | 3.82   | i175<br>9 | 134 | 186 | 315 | 335 | 846 | 105<br>9 | 108<br>9 | 1112     | 138<br>5 | 154<br>8 | 157<br>1 | 161<br>6 | 175<br>7 | 292<br>1 | 307<br>1 | 316<br>7 | 380<br>5 |
| TS2 | <i>c</i> | 3.86   | i149<br>4 | 172 | 200 | 272 | 451 | 780 | 104<br>6 | 115<br>3 | 118<br>2 | 133<br>7 | 145<br>7 | 148<br>1 | 152<br>3 | 162<br>4 | 303<br>0 | 311<br>0 | 311<br>8 | 378<br>3 |
|     | <i>d</i> | 4.18   | i226<br>2 | 127 | 174 | 229 | 395 | 776 | 103<br>3 | 112<br>4 | 117<br>1 | 130<br>5 | 144<br>5 | 146<br>5 | 151<br>1 | 162<br>5 | 301<br>6 | 309<br>0 | 311<br>2 | 378<br>3 |
|     | <i>e</i> | 2.16   | i153<br>3 | 108 | 183 | 233 | 422 | 789 | 107<br>1 | 114<br>8 | 118<br>9 | 130<br>8 | 147<br>7 | 149<br>5 | 153<br>3 | 165<br>2 | 307<br>7 | 313<br>9 | 315<br>7 | 384<br>7 |
|     | <i>f</i> | 2.04   | i152<br>2 | 106 | 198 | 279 | 353 | 857 | 107<br>9 | 1113     | 116<br>0 | 135<br>0 | 161<br>8 | 168<br>4 | 169<br>5 | 181<br>8 | 310<br>2 | 311<br>7 | 319<br>3 | 388<br>6 |

<sup>a</sup>This work, PESH-PIP; <sup>b</sup>This work, PESH; <sup>c</sup>This work, UCCSD(T)-F12a/AVTZ; <sup>d</sup>This work, UCCSD(T)-F12a/AVDZ; <sup>e</sup>This work, M05-2X/6-311+G(3df,2p); <sup>f</sup>This work, PESL; <sup>g</sup> See <http://cccbdb.nist.gov/> and ATcT.

**Table S2.** Comparison of energies (kcal/mol) and vibrational harmonic frequencies (cm<sup>-1</sup>) of the stationary points for the title reaction at selected several DFT methods.

| Species                 | Method                              | Energy   | Frequencies |      |      |      |      |      |      |      |      |      |      |      |      |    |    |    |    |    |
|-------------------------|-------------------------------------|----------|-------------|------|------|------|------|------|------|------|------|------|------|------|------|----|----|----|----|----|
|                         |                                     |          | 1           | 2    | 3    | 4    | 5    | 6    | 7    | 8    | 9    | 10   | 11   | 12   | 13   | 14 | 15 | 16 | 17 | 18 |
| OH + CH <sub>3</sub> OH | <i>a</i>                            | 0.00     | 3697        | 291  | 1039 | 1076 | 1171 | 1366 | 1477 | 1498 | 1509 | 2994 | 3039 | 3108 | 3829 |    |    |    |    |    |
|                         | <i>b</i>                            | 0.00     | 3864        | 295  | 1100 | 1125 | 1221 | 1414 | 1536 | 1554 | 1564 | 3087 | 3135 | 3198 | 4004 |    |    |    |    |    |
|                         | <i>c</i>                            | 0.00     | 3796        | 298  | 1074 | 1107 | 1196 | 1379 | 1502 | 1527 | 1536 | 2998 | 3051 | 3114 | 3938 |    |    |    |    |    |
|                         | <i>d</i>                            | 0.00     | 3779        | 310  | 1071 | 1100 | 1180 | 1368 | 1476 | 1501 | 1509 | 3080 | 3138 | 3199 | 3912 |    |    |    |    |    |
|                         | <i>e</i>                            | 0.00     | 3773        | 291  | 1070 | 1098 | 1193 | 1368 | 1502 | 1533 | 1540 | 3080 | 3129 | 3188 | 3898 |    |    |    |    |    |
|                         | <i>f</i>                            | 0.00     | 3759        | 275  | 1060 | 1109 | 1175 | 1346 | 1467 | 1483 | 1495 | 3009 | 3068 | 3136 | 3922 |    |    |    |    |    |
|                         | <i>g</i>                            | 0.00     | 3770        | 304  | 1070 | 1110 | 1181 | 1370 | 1486 | 1511 | 1519 | 3039 | 3092 | 3150 | 3901 |    |    |    |    |    |
|                         | <i>h</i>                            | 0.00     | 3754        | 277  | 1053 | 1111 | 1167 | 1350 | 1462 | 1471 | 1486 | 2977 | 3033 | 3099 | 3903 |    |    |    |    |    |
|                         | <i>i</i>                            | 0.00     | 3799        | 290  | 1073 | 1105 | 1206 | 1365 | 1523 | 1554 | 1567 | 3104 | 3146 | 3190 | 3918 |    |    |    |    |    |
|                         | <i>j</i>                            | 0.00     | 3832        | 286  | 1079 | 1124 | 1194 | 1390 | 1498 | 1520 | 1531 | 3057 | 3116 | 3180 | 3962 |    |    |    |    |    |
|                         | <i>k</i>                            | 0.00     | 3722        | 291  | 1043 | 1077 | 1174 | 1366 | 1481 | 1500 | 1511 | 2991 | 3037 | 3107 | 3855 |    |    |    |    |    |
|                         | <i>l</i>                            | 0.00     | 3806        | 294  | 1074 | 1101 | 1198 | 1371 | 1506 | 1534 | 1541 | 3072 | 3123 | 3182 | 3929 |    |    |    |    |    |
|                         | H <sub>2</sub> O+CH <sub>2</sub> OH | <i>a</i> | -21.97      | 1627 | 3797 | 3900 | 414  | 529  | 1053 | 1199 | 1356 | 1482 | 3133 | 3272 | 3822 |    |    |    |    |    |
|                         |                                     | <i>b</i> | -17.38      | 1675 | 3962 | 4065 | 416  | 575  | 1091 | 1257 | 1402 | 1540 | 3220 | 3361 | 3999 |    |    |    |    |    |
| <i>c</i>                |                                     | -21.59   | 1634        | 3900 | 4005 | 443  | 587  | 1072 | 1255 | 1369 | 1507 | 3122 | 3265 | 3927 |      |    |    |    |    |    |
| <i>d</i>                |                                     | -22.58   | 1612        | 3872 | 3977 | 413  | 562  | 1061 | 1236 | 1358 | 1487 | 3204 | 3352 | 3906 |      |    |    |    |    |    |
| <i>e</i>                |                                     | -22.14   | 1611        | 3864 | 3962 | 402  | 560  | 1064 | 1232 | 1357 | 1506 | 3209 | 3347 | 3893 |      |    |    |    |    |    |
| <i>f</i>                |                                     | -22.44   | 1607        | 3874 | 3998 | 370  | 477  | 1047 | 1241 | 1337 | 1468 | 3153 | 3297 | 3899 |      |    |    |    |    |    |
| <i>g</i>                |                                     | -21.72   | 1620        | 3868 | 3971 | 408  | 581  | 1063 | 1236 | 1359 | 1494 | 3162 | 3300 | 3896 |      |    |    |    |    |    |
| <i>h</i>                |                                     | -21.94   | 1613        | 3861 | 3982 | 392  | 510  | 1041 | 1238 | 1340 | 1458 | 3103 | 3243 | 3887 |      |    |    |    |    |    |
| <i>i</i>                |                                     | -21.83   | 1598        | 3887 | 3972 | 404  | 644  | 1063 | 1240 | 1354 | 1525 | 3222 | 3354 | 3922 |      |    |    |    |    |    |
| <i>j</i>                |                                     | -18.33   | 1653        | 3919 | 4029 | 414  | 565  | 1071 | 1253 | 1381 | 1509 | 3191 | 3334 | 3954 |      |    |    |    |    |    |

|                                      |          |        |      |      |      |      |      |      |      |      |      |      |      |      |      |      |      |      |      |      |
|--------------------------------------|----------|--------|------|------|------|------|------|------|------|------|------|------|------|------|------|------|------|------|------|------|
| H <sub>2</sub> O + CH <sub>3</sub> O | <i>k</i> | -22.15 | 1627 | 3823 | 3926 | 415  | 531  | 1054 | 1204 | 1356 | 1484 | 3129 | 3271 | 3850 |      |      |      |      |      |      |
|                                      | <i>l</i> | -22.20 | 1614 | 3895 | 3996 | 406  | 553  | 1066 | 1238 | 1359 | 1509 | 3205 | 3346 | 3922 |      |      |      |      |      |      |
|                                      | <i>a</i> | -14.85 | 1627 | 3797 | 3900 | 667  | 956  | 1103 | 1353 | 1363 | 1510 | 2887 | 2964 | 3007 |      |      |      |      |      |      |
|                                      | <i>b</i> | -12.49 | 1675 | 3962 | 4065 | 749  | 1011 | 1155 | 1446 | 1447 | 1565 | 3032 | 3100 | 3140 |      |      |      |      |      |      |
|                                      | <i>c</i> | -14.51 | 1634 | 3900 | 4005 | 789  | 977  | 1151 | 1390 | 1392 | 1535 | 2912 | 2986 | 3032 |      |      |      |      |      |      |
|                                      | <i>d</i> | -13.56 | 1612 | 3872 | 3977 | 875  | 972  | 1138 | 1379 | 1385 | 1509 | 3006 | 3082 | 3127 |      |      |      |      |      |      |
|                                      | <i>e</i> | -13.32 | 1611 | 3864 | 3962 | 869  | 980  | 1135 | 1409 | 1415 | 1539 | 3005 | 3077 | 3119 |      |      |      |      |      |      |
|                                      | <i>f</i> | -14.98 | 1607 | 3874 | 3998 | 834  | 963  | 1142 | 1348 | 1352 | 1498 | 2924 | 2996 | 3039 |      |      |      |      |      |      |
|                                      | <i>g</i> | -13.10 | 1620 | 3868 | 3971 | 389  | 969  | 1135 | 1385 | 1387 | 1519 | 2965 | 3039 | 3080 |      |      |      |      |      |      |
|                                      | <i>h</i> | -14.52 | 1613 | 3861 | 3982 | -363 | 957  | 1138 | 1333 | 1342 | 1491 | 2885 | 2957 | 2999 |      |      |      |      |      |      |
|                                      | <i>i</i> | -11.18 | 1598 | 3887 | 3972 | 996  | 1024 | 1138 | 1451 | 1465 | 1569 | 3045 | 3115 | 3151 |      |      |      |      |      |      |
|                                      | <i>j</i> | -12.51 | 1653 | 3919 | 4029 | 731  | 981  | 1158 | 1396 | 1398 | 1534 | 2983 | 3060 | 3103 |      |      |      |      |      |      |
|                                      | <i>k</i> | -15.03 | 1627 | 3823 | 3926 | 663  | 959  | 1107 | 1355 | 1366 | 1512 | 2880 | 2961 | 3005 |      |      |      |      |      |      |
|                                      | <i>l</i> | -13.44 | 1614 | 3895 | 3996 | 857  | 982  | 1138 | 1411 | 1416 | 1540 | 2998 | 3070 | 3112 |      |      |      |      |      |      |
| RC                                   | <i>a</i> | -4.73  | 80   | 108  | 203  | 225  | 318  | 455  | 1029 | 1080 | 1165 | 1359 | 1468 | 1496 | 1505 | 3013 | 3074 | 3120 | 3738 | 3775 |
|                                      | <i>b</i> | -3.31  | 34   | 65   | 115  | 131  | 282  | 390  | 1124 | 1145 | 1222 | 1444 | 1536 | 1554 | 1565 | 3081 | 3126 | 3189 | 3852 | 3943 |
|                                      | <i>c</i> | -5.96  | 116  | 52   | 232  | 288  | 398  | 623  | 1085 | 1099 | 1200 | 1381 | 1504 | 1527 | 1537 | 3016 | 3078 | 3128 | 3645 | 3937 |
|                                      | <i>d</i> | -6.68  | 134  | 54   | 198  | 284  | 373  | 594  | 1076 | 1084 | 1184 | 1361 | 1480 | 1504 | 1509 | 3099 | 3167 | 3212 | 3611 | 3917 |
|                                      | <i>e</i> | -6.78  | 47   | 57   | 200  | 285  | 398  | 610  | 1074 | 1086 | 1197 | 1364 | 1506 | 1534 | 1540 | 3097 | 3156 | 3197 | 3605 | 3899 |
|                                      | <i>f</i> | -3.78  | 41   | 102  | 134  | 205  | 294  | 497  | 1098 | 1121 | 1173 | 1380 | 1466 | 1484 | 1496 | 3002 | 3058 | 3128 | 3744 | 3810 |
|                                      | <i>g</i> | -6.71  | 46   | 80   | 207  | 285  | 446  | 624  | 1077 | 1097 | 1185 | 1365 | 1489 | 1516 | 1520 | 3054 | 3118 | 3158 | 3603 | 3904 |
|                                      | <i>h</i> | -5.34  | 106  | 139  | 201  | 215  | 333  | 451  | 1059 | 1097 | 1165 | 1349 | 1456 | 1469 | 1480 | 2992 | 3059 | 3109 | 3782 | 3851 |
|                                      | <i>i</i> | -6.84  | 83   | 124  | 204  | 318  | 489  | 673  | 1073 | 1081 | 1210 | 1365 | 1525 | 1570 | 1574 | 3114 | 3168 | 3203 | 3544 | 3909 |
|                                      | <i>j</i> | -3.17  | 39   | 64   | 112  | 132  | 289  | 398  | 1114 | 1137 | 1196 | 1424 | 1499 | 1520 | 1532 | 3047 | 3103 | 3167 | 3818 | 3872 |



|     |          |        |      |     |     |     |     |     |      |      |      |      |      |      |      |      |      |      |      |      |
|-----|----------|--------|------|-----|-----|-----|-----|-----|------|------|------|------|------|------|------|------|------|------|------|------|
| PC1 | <i>k</i> | -5.04  | 84   | 112 | 209 | 232 | 332 | 458 | 1033 | 1080 | 1169 | 1360 | 1472 | 1498 | 1508 | 3010 | 3073 | 3119 | 3768 | 3814 |
|     | <i>l</i> | -6.81  | i6   | 48  | 204 | 263 | 408 | 605 | 1078 | 1088 | 1203 | 1366 | 1510 | 1535 | 1542 | 3088 | 3148 | 3191 | 3653 | 3930 |
|     | <i>a</i> | -27.90 | 55   | 64  | 90  | 174 | 354 | 435 | 865  | 985  | 1102 | 1351 | 1364 | 1506 | 1644 | 2885 | 2979 | 3033 | 3674 | 3872 |
|     | <i>b</i> | -23.62 | 61   | 70  | 96  | 178 | 346 | 430 | 973  | 1041 | 1151 | 1443 | 1452 | 1564 | 1690 | 3031 | 3109 | 3156 | 3874 | 4040 |
|     | <i>c</i> | -27.37 | i36  | 83  | 97  | 226 | 388 | 423 | 864  | 1021 | 1150 | 1382 | 1397 | 1523 | 1656 | 2907 | 2996 | 3055 | 3811 | 3977 |
|     | <i>d</i> | -29.09 | 83   | 128 | 145 | 155 | 194 | 292 | 516  | 725  | 1094 | 1256 | 1414 | 1488 | 1607 | 3199 | 3345 | 3751 | 3874 | 3979 |
|     | <i>e</i> | -28.75 | 55   | 91  | 109 | 185 | 350 | 404 | 828  | 1044 | 1159 | 1395 | 1431 | 1529 | 1623 | 3004 | 3080 | 3143 | 3770 | 3938 |
|     | <i>f</i> | -29.02 | 36   | 55  | 106 | 188 | 360 | 455 | 878  | 1032 | 1143 | 1336 | 1364 | 1494 | 1621 | 2923 | 3004 | 3067 | 3764 | 3969 |
|     | <i>g</i> | -28.45 | i190 | 45  | 75  | 119 | 191 | 338 | 625  | 1044 | 1191 | 1357 | 1428 | 1496 | 1622 | 2971 | 3016 | 3107 | 3787 | 3947 |
|     | <i>h</i> | -28.33 | 40   | 120 | 131 | 198 | 232 | 357 | 645  | 1051 | 1189 | 1311 | 1373 | 1467 | 1619 | 2893 | 2932 | 3030 | 3742 | 3952 |
|     | <i>i</i> | -28.54 | 13   | 104 | 143 | 185 | 363 | 443 | 878  | 1056 | 1190 | 1427 | 1497 | 1537 | 1610 | 3046 | 3105 | 3175 | 3785 | 3947 |
|     | <i>j</i> | -24.39 | 67   | 77  | 92  | 180 | 358 | 445 | 924  | 1016 | 1151 | 1390 | 1404 | 1530 | 1669 | 2981 | 3071 | 3125 | 3801 | 3999 |
|     | <i>k</i> | -28.28 | 53   | 67  | 87  | 178 | 357 | 447 | 867  | 992  | 1108 | 1353 | 1367 | 1509 | 1649 | 2879 | 2974 | 3029 | 3705 | 3898 |
|     | <i>l</i> | -28.76 | 24   | 83  | 135 | 158 | 201 | 290 | 520  | 739  | 1106 | 1257 | 1415 | 1509 | 1613 | 3194 | 3333 | 3764 | 3887 | 3987 |
| PC2 | <i>a</i> | -19.07 | 64   | 89  | 158 | 183 | 246 | 291 | 479  | 767  | 1100 | 1219 | 1421 | 1483 | 1628 | 3125 | 3260 | 3613 | 3792 | 3891 |
|     | <i>b</i> | -16.83 | 72   | 85  | 151 | 178 | 223 | 281 | 540  | 767  | 1137 | 1277 | 1464 | 1542 | 1677 | 3211 | 3347 | 3819 | 3957 | 4057 |
|     | <i>c</i> | -18.72 | 65   | 77  | 147 | 203 | 249 | 290 | 551  | 764  | 1121 | 1274 | 1431 | 1508 | 1634 | 3114 | 3251 | 3757 | 3891 | 3993 |
|     | <i>d</i> | -19.10 | i61  | 92  | 111 | 189 | 314 | 336 | 689  | 1053 | 1195 | 1351 | 1436 | 1483 | 1622 | 3025 | 3066 | 3161 | 3787 | 3959 |
|     | <i>e</i> | -18.55 | 55   | 85  | 143 | 174 | 215 | 279 | 518  | 735  | 1111 | 1249 | 1421 | 1507 | 1611 | 3202 | 3338 | 3714 | 3857 | 3954 |
|     | <i>f</i> | -19.88 | 57   | 76  | 147 | 201 | 245 | 276 | 414  | 747  | 1095 | 1262 | 1401 | 1470 | 1605 | 3143 | 3282 | 3701 | 3864 | 3983 |
|     | <i>g</i> | -18.40 | 101  | 141 | 207 | 219 | 245 | 351 | 662  | 676  | 1103 | 1252 | 1418 | 1495 | 1613 | 3142 | 3278 | 3766 | 3834 | 3947 |
|     | <i>h</i> | -19.46 | 65   | 120 | 199 | 224 | 259 | 322 | 537  | 696  | 1090 | 1259 | 1419 | 1464 | 1610 | 3086 | 3222 | 3698 | 3849 | 3967 |
|     | <i>i</i> | -16.29 | 52   | 151 | 192 | 208 | 268 | 339 | 666  | 715  | 1121 | 1255 | 1436 | 1535 | 1595 | 3208 | 3342 | 3734 | 3869 | 3956 |
|     | <i>j</i> | -16.54 | 65   | 87  | 160 | 189 | 252 | 292 | 524  | 786  | 1121 | 1273 | 1451 | 1510 | 1654 | 3182 | 3321 | 3724 | 3912 | 4018 |

|     |          |        |       |     |     |     |     |     |      |      |      |      |      |      |      |      |      |      |      |      |
|-----|----------|--------|-------|-----|-----|-----|-----|-----|------|------|------|------|------|------|------|------|------|------|------|------|
| TS1 | <i>k</i> | -19.50 | 63    | 89  | 159 | 184 | 254 | 294 | 483  | 784  | 1103 | 1223 | 1422 | 1485 | 1629 | 3121 | 3258 | 3643 | 3815 | 3915 |
|     | <i>l</i> | -18.86 | i14   | 43  | 111 | 195 | 285 | 337 | 687  | 1056 | 1211 | 1385 | 1464 | 1515 | 1624 | 3013 | 3044 | 3141 | 3803 | 3967 |
|     | <i>a</i> | -3.43  | i821  | 110 | 175 | 243 | 411 | 748 | 1037 | 1126 | 1159 | 1363 | 1444 | 1457 | 1499 | 1794 | 2999 | 3053 | 3082 | 3760 |
|     | <i>b</i> | 7.52   | i2444 | 134 | 192 | 223 | 444 | 800 | 1089 | 1168 | 1214 | 1317 | 1423 | 1503 | 1513 | 1561 | 3093 | 3155 | 3173 | 3930 |
|     | <i>c</i> | 1.92   | i1561 | 114 | 182 | 224 | 420 | 782 | 1080 | 1143 | 1186 | 1320 | 1466 | 1480 | 1522 | 1568 | 3001 | 3064 | 3087 | 3855 |
|     | <i>d</i> | -6.68  | i890  | 77  | 160 | 226 | 438 | 715 | 956  | 1076 | 1148 | 1340 | 1393 | 1425 | 1481 | 1716 | 3117 | 3220 | 3789 | 3895 |
|     | <i>e</i> | 2.17   | i1583 | 115 | 182 | 228 | 415 | 781 | 1066 | 1141 | 1184 | 1293 | 1473 | 1494 | 1530 | 1630 | 3084 | 3145 | 3163 | 3818 |
|     | <i>f</i> | 0.43   | i1638 | 126 | 187 | 238 | 426 | 761 | 1077 | 1130 | 1161 | 1331 | 1427 | 1438 | 1482 | 1564 | 3008 | 3077 | 3101 | 3824 |
|     | <i>g</i> | 1.91   | i1288 | 118 | 185 | 228 | 408 | 781 | 1081 | 1134 | 1173 | 1303 | 1456 | 1472 | 1511 | 1714 | 3042 | 3108 | 3124 | 3815 |
|     | <i>h</i> | -0.66  | i1515 | 120 | 186 | 232 | 411 | 756 | 1076 | 1128 | 1155 | 1335 | 1422 | 1426 | 1476 | 1693 | 2977 | 3045 | 3068 | 3821 |
|     | <i>i</i> | 5.56   | i1691 | 136 | 194 | 247 | 406 | 793 | 1075 | 1127 | 1191 | 1262 | 1490 | 1515 | 1529 | 1559 | 3106 | 3159 | 3172 | 3820 |
|     | <i>j</i> | 7.32   | i1581 | 123 | 186 | 237 | 421 | 797 | 1093 | 1154 | 1185 | 1334 | 1467 | 1482 | 1522 | 1628 | 3060 | 3135 | 3150 | 3879 |
|     | <i>k</i> | -3.53  | i788  | 109 | 174 | 246 | 407 | 752 | 1042 | 1130 | 1162 | 1373 | 1448 | 1459 | 1501 | 1847 | 2997 | 3051 | 3080 | 3785 |
|     | <i>l</i> | -6.81  | i1016 | 93  | 170 | 241 | 433 | 739 | 947  | 1080 | 1156 | 1354 | 1409 | 1442 | 1508 | 1649 | 3104 | 3203 | 3812 | 3909 |
| TS2 | <i>a</i> | -2.27  | i171  | 109 | 141 | 224 | 395 | 517 | 1037 | 1071 | 1151 | 1362 | 1449 | 1476 | 1490 | 2730 | 3030 | 3119 | 3687 | 3820 |
|     | <i>b</i> | 4.25   | i1219 | 106 | 143 | 278 | 440 | 750 | 893  | 1108 | 1190 | 1209 | 1384 | 1426 | 1508 | 1546 | 3122 | 3229 | 3905 | 3987 |
|     | <i>c</i> | -0.41  | i301  | 67  | 134 | 212 | 404 | 707 | 1082 | 1121 | 1176 | 1373 | 1418 | 1478 | 1505 | 2001 | 3027 | 3129 | 3813 | 3921 |
|     | <i>d</i> | 0.35   | i1511 | 121 | 186 | 246 | 419 | 764 | 1069 | 1136 | 1168 | 1312 | 1446 | 1464 | 1499 | 1675 | 3088 | 3160 | 3176 | 3826 |
|     | <i>e</i> | 0.77   | i945  | 87  | 164 | 229 | 423 | 734 | 956  | 1076 | 1151 | 1352 | 1408 | 1446 | 1506 | 1660 | 3111 | 3207 | 3783 | 3880 |
|     | <i>f</i> | -1.97  | i581  | 111 | 141 | 264 | 442 | 770 | 1069 | 1116 | 1156 | 1260 | 1339 | 1375 | 1460 | 1527 | 3042 | 3158 | 3813 | 3884 |
|     | <i>g</i> | 0.57   | i755  | 95  | 163 | 224 | 421 | 730 | 999  | 1076 | 1156 | 1352 | 1402 | 1448 | 1489 | 1769 | 3068 | 3164 | 3774 | 3884 |
|     | <i>h</i> | -2.48  | i355  | 53  | 117 | 243 | 424 | 754 | 1052 | 1121 | 1162 | 1320 | 1360 | 1416 | 1454 | 1646 | 3006 | 3116 | 3798 | 3874 |
|     | <i>i</i> | 3.84   | i1885 | 128 | 196 | 242 | 452 | 718 | 815  | 1071 | 1146 | 1353 | 1402 | 1439 | 1539 | 1613 | 3140 | 3219 | 3778 | 3904 |
|     | <i>j</i> | 3.06   | i354  | 72  | 139 | 213 | 397 | 718 | 1082 | 1128 | 1176 | 1379 | 1415 | 1482 | 1500 | 1974 | 3087 | 3191 | 3843 | 3942 |

|          |       |       |     |     |     |     |     |      |      |      |      |      |      |      |      |      |      |      |      |
|----------|-------|-------|-----|-----|-----|-----|-----|------|------|------|------|------|------|------|------|------|------|------|------|
| <i>k</i> | -2.48 | i168  | 109 | 141 | 225 | 398 | 530 | 1044 | 1072 | 1154 | 1362 | 1448 | 1480 | 1492 | 2714 | 3027 | 3117 | 3715 | 3845 |
| <i>l</i> | 0.88  | i1533 | 108 | 183 | 233 | 422 | 789 | 1071 | 1148 | 1189 | 1308 | 1477 | 1495 | 1533 | 1652 | 3077 | 3139 | 3157 | 3847 |

<sup>a</sup> B3LYP/AVTZ; <sup>b</sup> BH-HLYP/AVTZ; <sup>c</sup> BMK/AVTZ; <sup>d</sup> M05-2X/AVDZ; <sup>e</sup> M05-2X/AVTZ; <sup>f</sup> M05/AVTZ; <sup>g</sup> M06-2X/AVTZ; <sup>h</sup> M06/AVTZ; <sup>i</sup> M06-HF/AVTZ; <sup>j</sup> PBE0/AVTZ; <sup>k</sup> B3LYP/6-311+G(3df,2p); <sup>l</sup> M05-2X/6-311+G(3df,2p).

**Table S3** Most experimental overall rate constants of the title reaction at around 298 K.

| Authors      | Year | Methods  | T(K)  | k ( $10^{-12}$ cm <sup>3</sup> molecule <sup>-1</sup> s <sup>-1</sup> ) |
|--------------|------|----------|-------|-------------------------------------------------------------------------|
| Campbell     | 1976 | RR       | 292   | 0.94                                                                    |
| Overend      | 1978 | FP/RA    | 296   | 1.06                                                                    |
| Ravishankara | 1978 | FP/RF    | 298   | 1                                                                       |
| Hagele       | 1983 | LP/RF    | 295   | 0.78±0.15                                                               |
| Tuazon       | 1983 | RR       | 300±3 | 0.9±0.07                                                                |
| Greenhill    | 1986 | FP/RA    | 298   | 0.86                                                                    |
| Wallington   | 1987 | FP/RF    | 296   | 0.861±0.047                                                             |
| Pagsberg     | 1988 | PR/TAS   |       | 0.88                                                                    |
| Hess and Lin | 1989 | LP/LIF   | 298   | 0.943                                                                   |
| McCaulley    | 1989 | DF/LIF   | 298   | 1.01±0.1                                                                |
| Nelson       | 1990 | PR-RA    | 298±2 | 0.9±0.09                                                                |
| Nelson       | 1990 | RR       | 298±2 | 0.93±0.22                                                               |
| Picquet      | 1998 | RR       | 298±4 | 0.86±0.08                                                               |
| Oh           | 2001 | RR       | 298±2 | 0.96±0.1                                                                |
| Oh           | 2001 | RR       | 298±2 | 0.84±0.07                                                               |
| Sorensen     | 2002 | RR       | 296±2 | 0.79±0.05                                                               |
| Sorensen     | 2002 | RR       | 296±2 | 0.82±0.05                                                               |
| Jimenez      | 2003 | LP/LIF   | 298   | 0.93±0.11                                                               |
| Dillon       | 2005 | PLP/PLIF | 298   | 0.93±0.07                                                               |
| Atkinson     | 2006 | Fitting  | 298   | 0.9                                                                     |
| Srinivasan   | 2007 | RST/MASD | 298   | 1.0                                                                     |
| Gomez Martin | 2014 | LP/LIF   | 295   | 1.13                                                                    |
| Liu          | 2019 | S/UV LA  | 300   | 0.877                                                                   |

RR: Relative rate method.

FP/RA: Flash photolysis/resonance absorption.

FP/RF: Flash photolysis/resonance fluorescence.

LP/RF: Laser photolysis/resonance fluorescence.

PR/TAS: Pulse radiolysis combined with transient absorption spectrophotometry

LP/LIF: Laser photolysis/laser-induced fluorescence

DF/LIF: Discharge flow/laser-induced fluorescence.

PR-RA: The absolute technique of pulse radiolysis combined with kinetic UV spectroscopy && a conventional photolytic relative rate method

PLP/PLIF: Pulsed laser photolysis technique coupled with pulsed laser induced fluorescence

RST/MASD: The reflected shock tube technique with multipass absorption spectrometric detection of OH radicals at 308 nm

S/UV LA: shock tube/UV laser absorption
